# Supplementary material for: Genetic Characterization and Pathogenesis of Avian Influenza Virus H7N3 Isolated from Spot-Billed Ducks in South Korea, Early 2019
Source: MDPI journal article supplement (doi:10.3390/v13050856), 2021-05-07
Supplement: s1 [file s1]

## Supplementary data

# Genetic Characterization and Pathogenesis of Avian Influenza Virus H7N3 Isolated from Spot-Billed Ducks in South Korea, Early 2019

Thuy-Tien Thi Trinh <sup>1,†</sup>, Indira Tiwari <sup>1,†</sup>, Kaliannan Durairaj <sup>1,†</sup>, Bao Tuan Duong <sup>1</sup>, Anh Thi Viet Nguyen <sup>1</sup>, Hien Thi Tuong <sup>1</sup>, Vui Thi Hoang <sup>1</sup>, Duong Duc Than <sup>1</sup>, SunJeong Nam <sup>2</sup>, Seon-Ju Yeo <sup>3,\*</sup> and Hyun Park <sup>1,\*</sup>

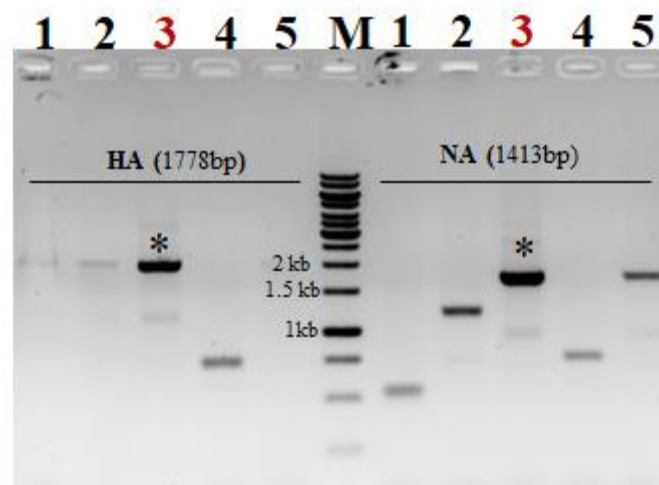

Figure S1. Amplification of HA and NA gene by influenza universal primer. (1–5; Selected colonies, \*; Target band).

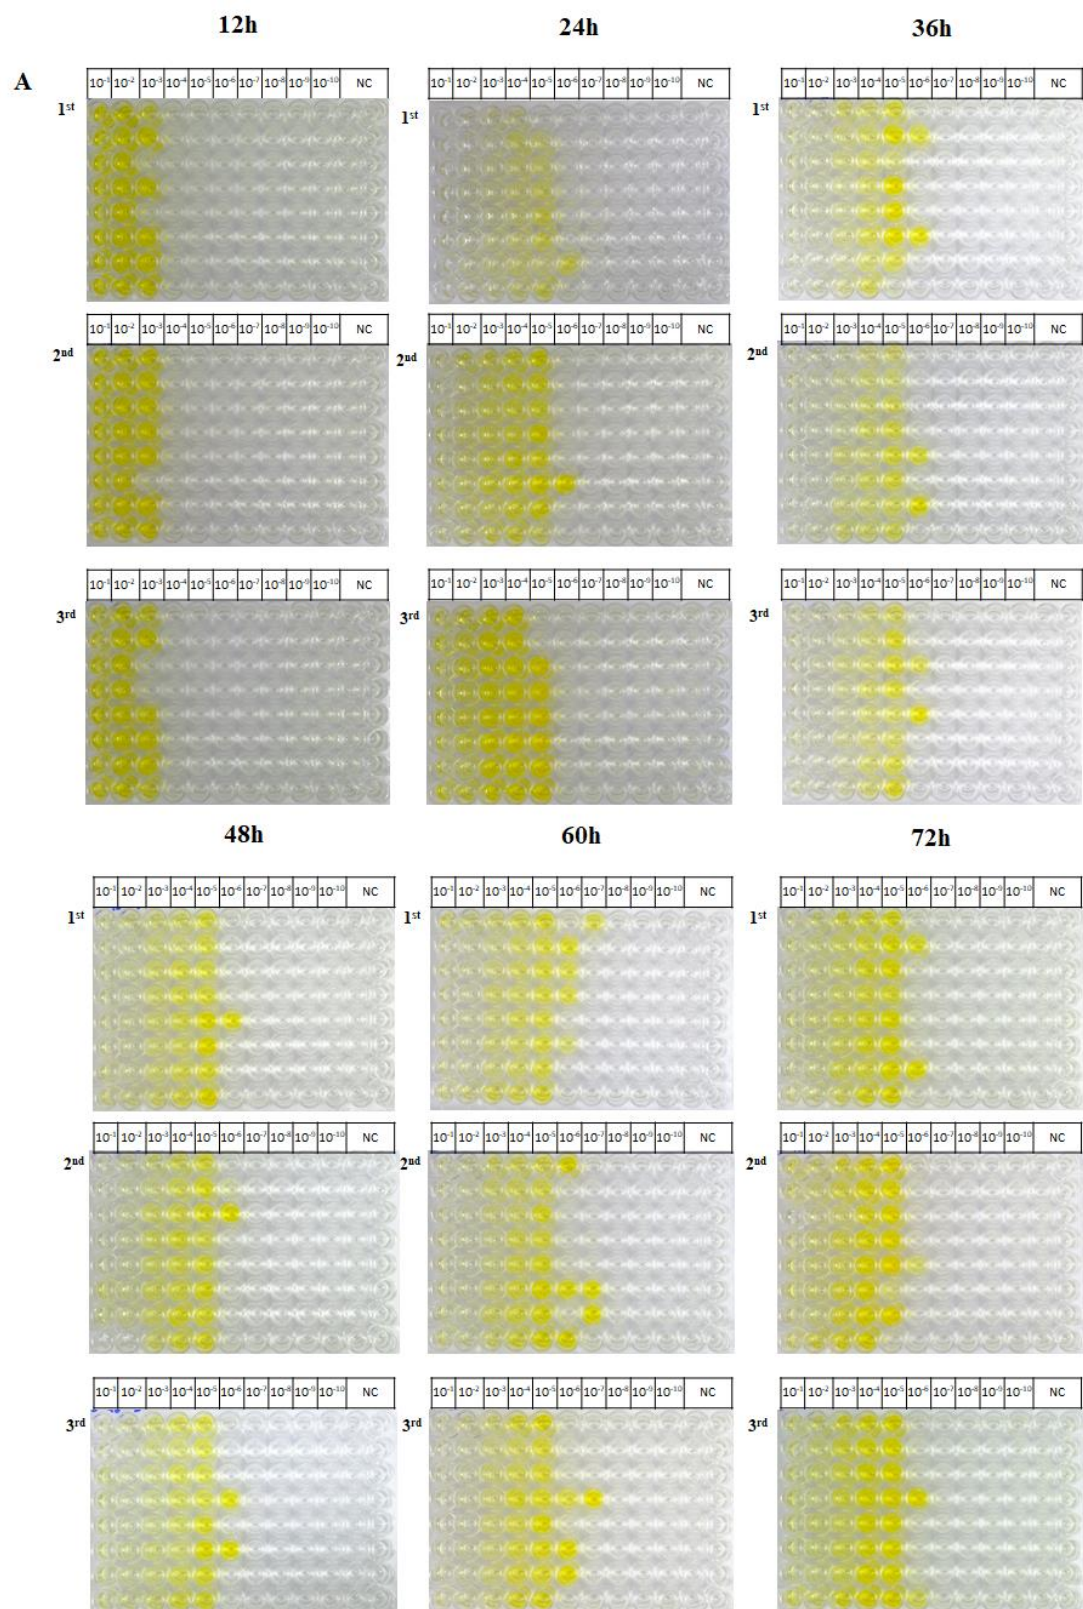

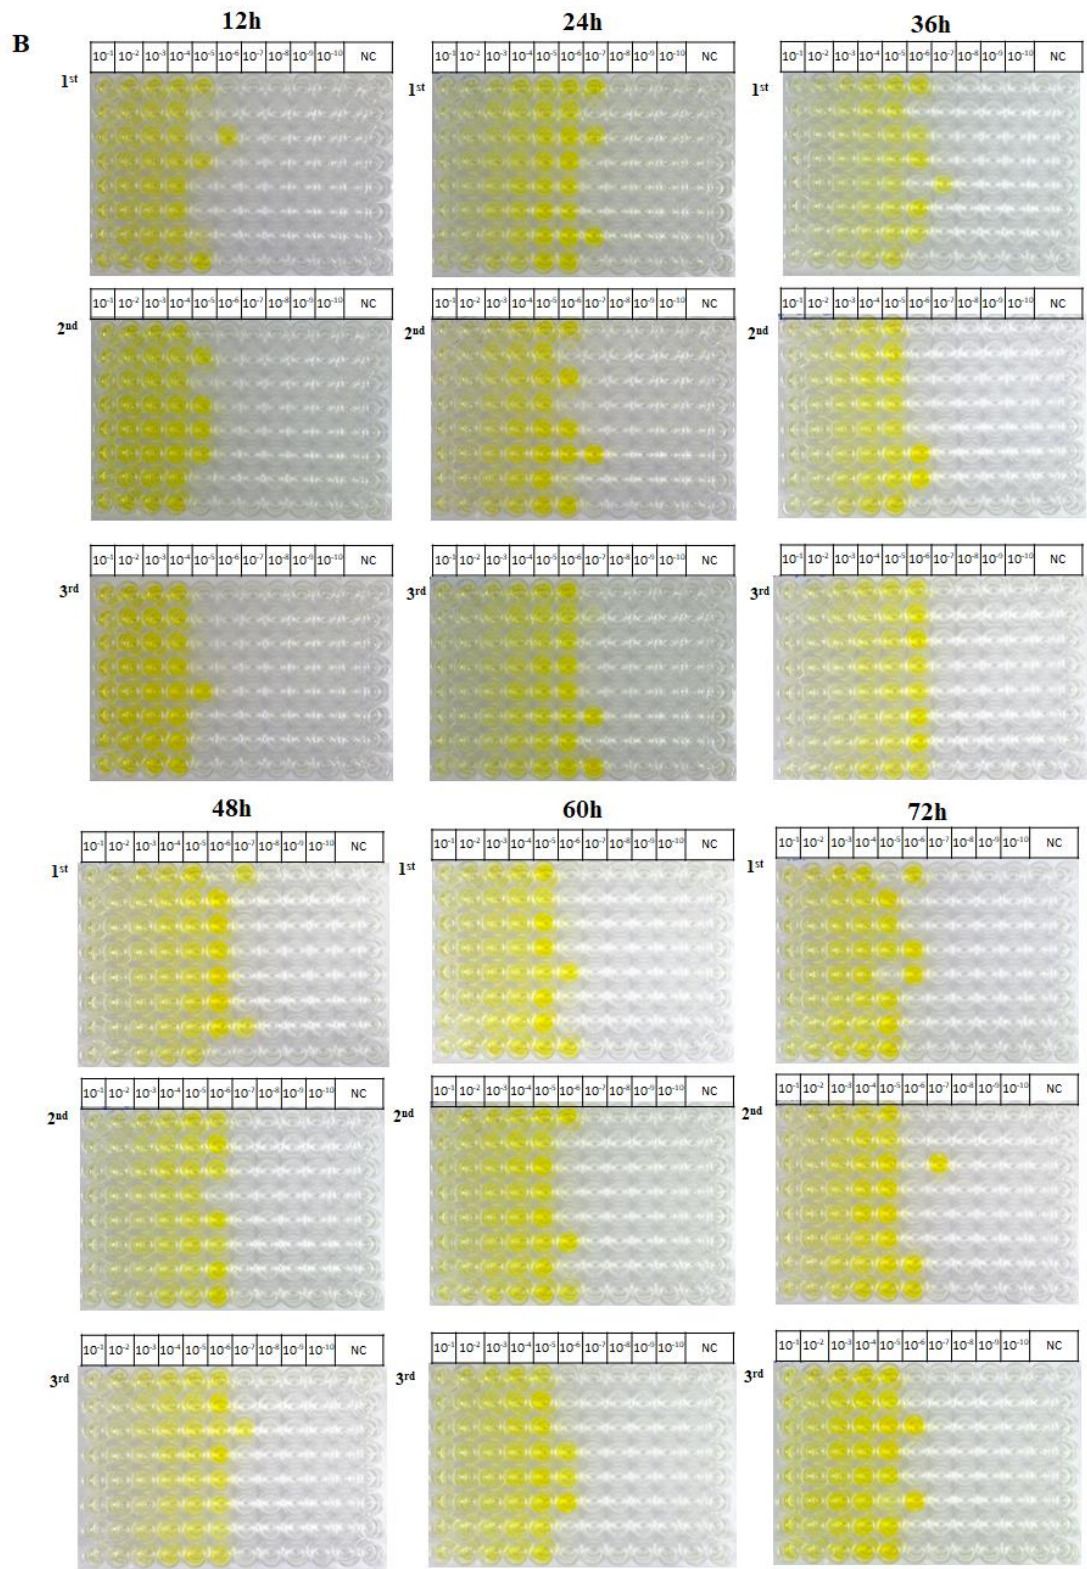



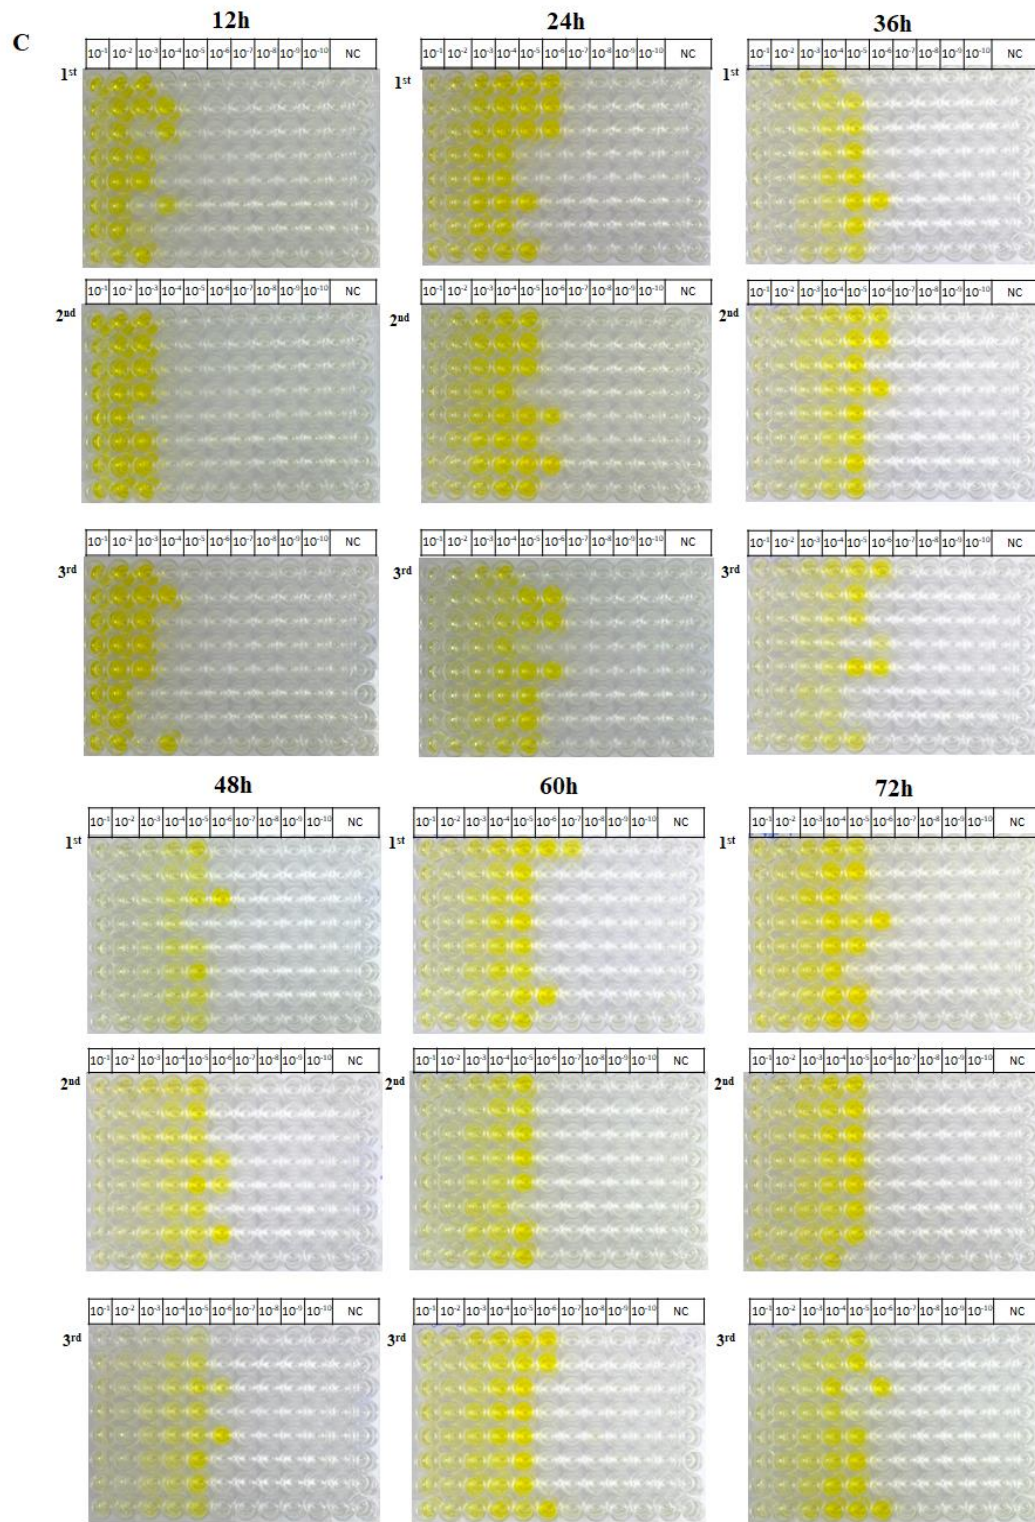

**Figure S2.** Raw ELISA data of TCID<sub>50</sub> assay for the detection of (A) H7N3 (WKU2019-1), (B) H1N1 (CA/04/09), and (C) H7N7 growth kinetics in MDCK cells.

**A****3 dpi****Mouse 1**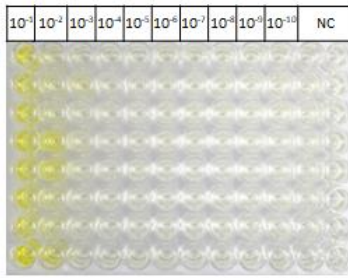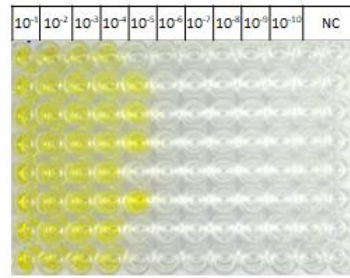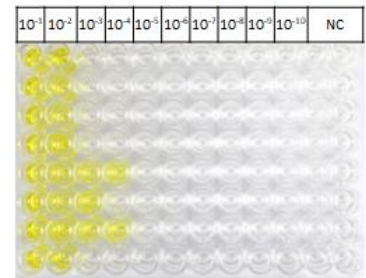**Mouse 2**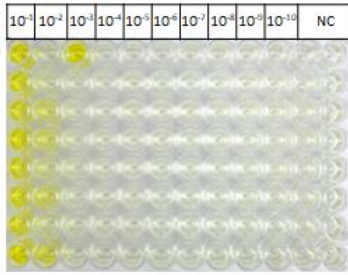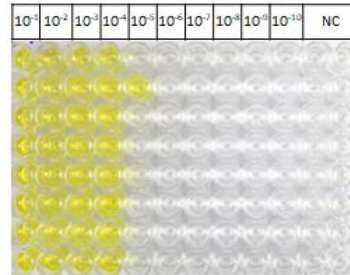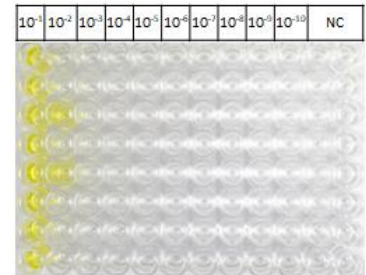**Mouse 3**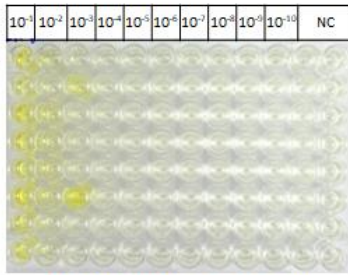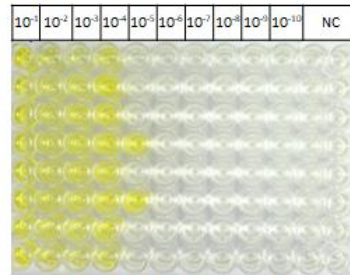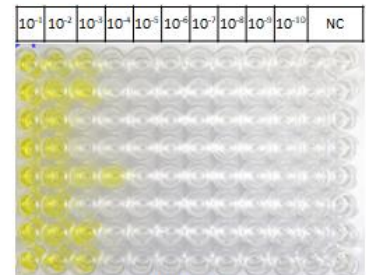**WKU2019-1 (H7N3)****H1N1 (CA/04/09)****H7N7**

**B**

**6 dpi**

**Mouse 1**

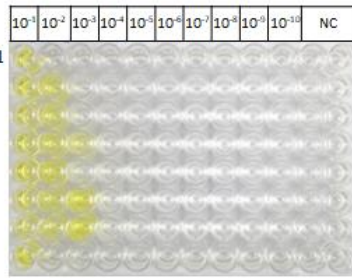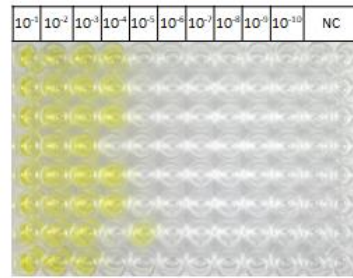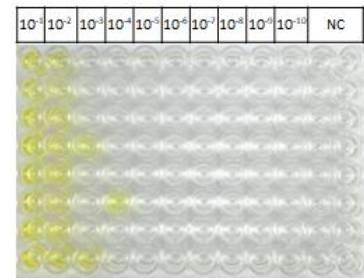

**Mouse 2**

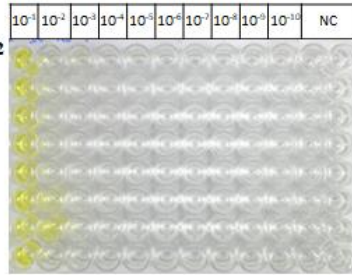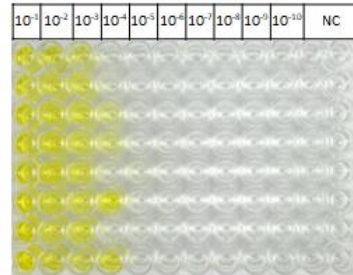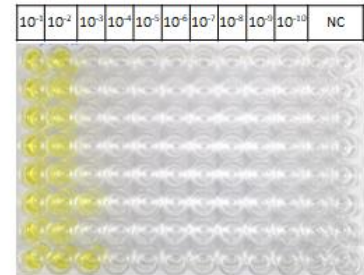

**Mouse 3**

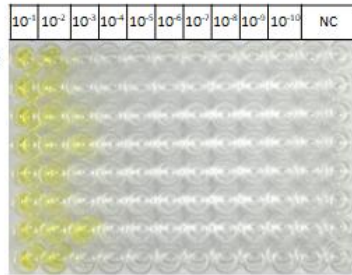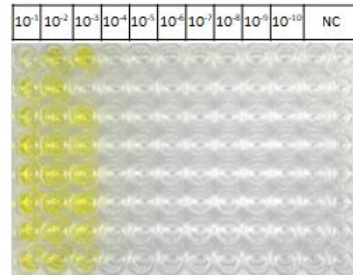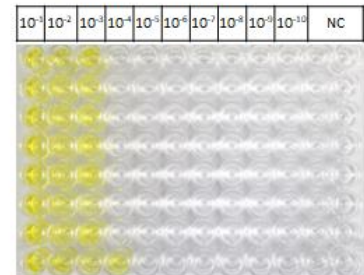

**WKU2019-1 (H7N3)**

**H1N1 (CA/04/09)**

**H7N7**



**C**

### Mouse 3

**Figure S3.** Raw ELISA data of TCID<sub>50</sub> assay for viral load shedding in lungs after (A) 3, (B) 6, and (C) 15 days post-infection.

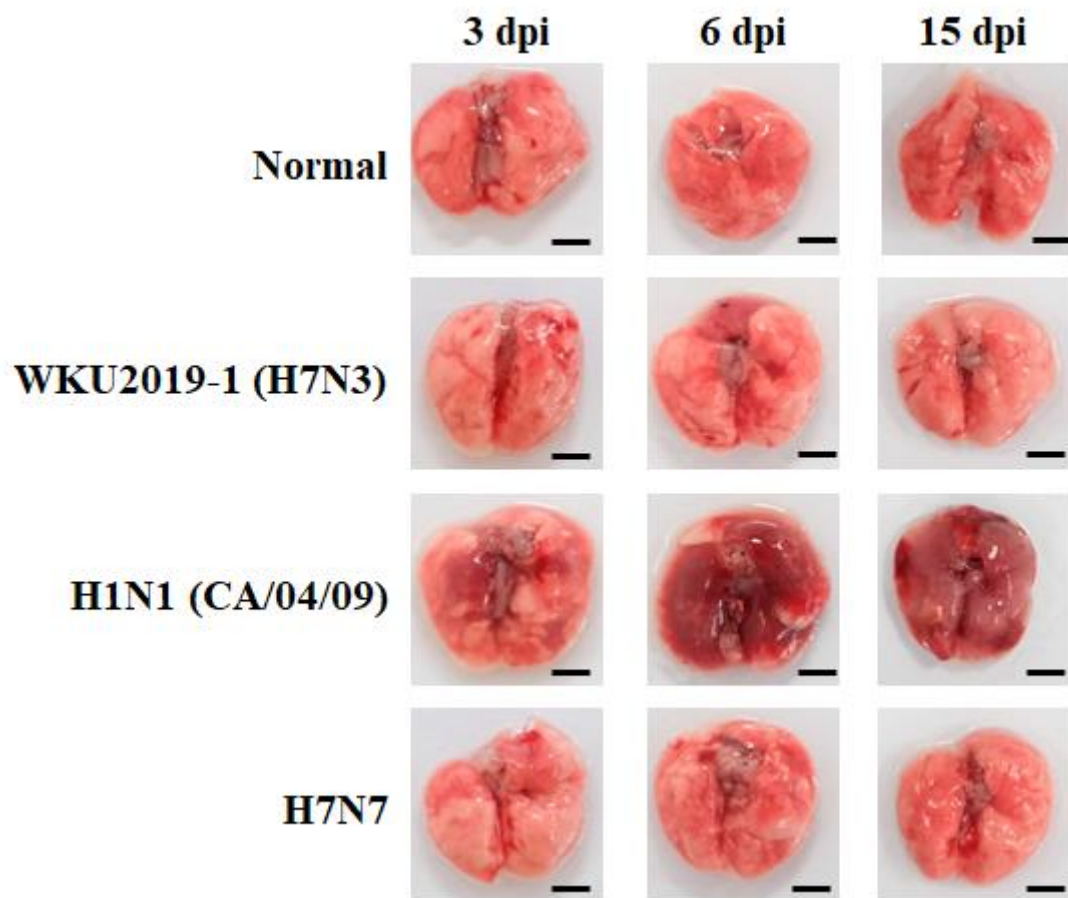

**Figure S4.** Lungs from normal and infected mice at 3, 6, and 15 days post-infection. Scale bar: 0.5 cm.

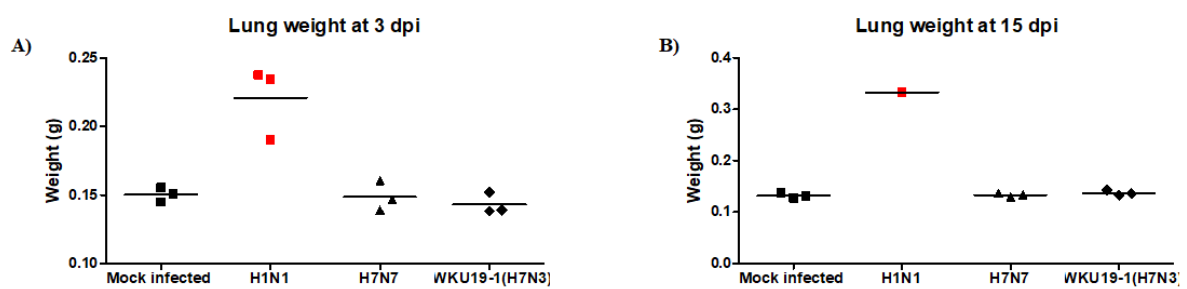

**Figure S5.** Lung weight at days (A) 3 and (B) 15 post-infection.



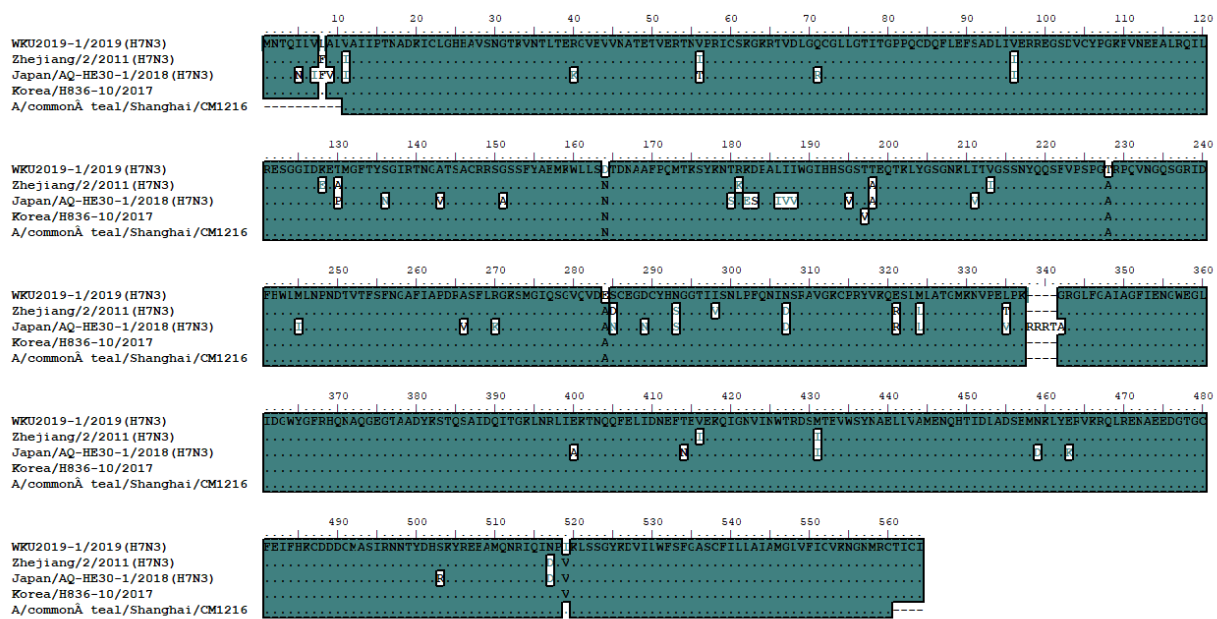

Figure S6. Partial aliment of HA gene segment.

Table S1. Detailed NGS analysis information of H7N3 (WKU2019-1) isolated from feces samples.

| Gene     | Sample Information       |                                      |                                |               |          | ORF Analysis   |            |            |        |            |            |
|----------|--------------------------|--------------------------------------|--------------------------------|---------------|----------|----------------|------------|------------|--------|------------|------------|
|          | # of Pre-processed reads | # of Influenza Virus extracted reads | # of non-Influenza Virus reads | Virus reads % | #M_Reads | Unique Matches | S_Co n._bp | %Cov.(S/R) | Length | S_position | E_position |
| PB2      | 14,874,694               | 110                                  | 14,874,584                     | 0.00%         | 1        | 0.90%          | -          | 4.22%      | 2,304  | 2          | 2,305      |
| PB1      |                          |                                      |                                |               | 6        | 5.50%          | -          | 11.76%     | 2,274  | 23         | 2,296      |
| PA       |                          |                                      |                                |               | 1        | 0.90%          | -          | 2.42%      | 2,157  | 19         | 2,175      |
| HA       |                          |                                      |                                |               | 5        | 4.50%          | -          | 9.59%      | 1,818  | 3          | 1,820      |
| NP       |                          |                                      |                                |               | 3        | 2.70%          | -          | 8.93%      | 1,542  | 2          | 1,543      |
| NA       |                          |                                      |                                |               |          |                | -          |            | 1,437  | 2          | 1,438      |
| M2, M1   |                          |                                      |                                |               | 19       | 17.30%         | -          | 44.17%     | 759    | 3          | 761        |
| NEP, NS1 |                          |                                      |                                |               |          |                | -          | 693        | 1      | 693        |            |

Table S2. Detailed NGS analysis information of H7N3 (WKU2019-1) isolated from allantoic fluid.

| Gene | Gene Bank ID | Reference Information Used for Mapping | Sample Information | ORF Analysis (Blast P, rank=1) |         |
|------|--------------|----------------------------------------|--------------------|--------------------------------|---------|
|      |              |                                        |                    | Matched Reference              | results |

|                     |              | Reference<br>name                                          | Ref. ID      | Ref.<br>length | # of<br>Pre-pro-<br>cessed<br>reads | #<br>virus<br>reads | %<br>virus<br>reads | #Map<br>ped<br>reads | Total<br>Map-<br>ping<br>avg.<br>depth | %Cov  | Length | ID              | Length | %Identity         |
|---------------------|--------------|------------------------------------------------------------|--------------|----------------|-------------------------------------|---------------------|---------------------|----------------------|----------------------------------------|-------|--------|-----------------|--------|-------------------|
| <i>PB2</i>          | MT84565<br>4 | A/mal-<br>lard/Ba-<br>varia/185-<br>26/2008(H1<br>N1)      | HQ25922<br>9 | 2,306          |                                     |                     |                     | 12,200               |                                        |       | 2,307  | AXK5892<br>9.1  | 759    | 756/759<br>(99%)  |
| <i>PB1</i>          | MT84565<br>5 | A/mallard<br>duck/Geor-<br>gia/10/2016(<br>H7N7)           | MF69402<br>1 | 2,341          |                                     |                     |                     | 58,963               |                                        |       | 2,341  | BAJ83375.<br>1  | 757    | 751/757<br>(99%)  |
| <i>PA</i>           | MT84565<br>6 | A/mal-<br>lard/Ba-<br>varia/185-<br>26/2008(H1<br>N1)      | HQ25923<br>1 | 2,221          |                                     |                     |                     | 20,815               |                                        |       | 2,223  | AXK5896<br>8.1  | 716    | 712/716<br>(99%)  |
| <i>HA</i>           | MT84565<br>7 | A/mallard<br>duck/Geor-<br>gia/10/2016(<br>H7N7)           | MF69424<br>4 | 1,732          |                                     |                     |                     | 68,166               |                                        |       | 1,731  | QEQ7613<br>1.1  | 560    | 558/560<br>(99%)  |
|                     |              |                                                            |              |                | 8,900,256                           | 7,189,378           | 80.78               |                      | 7,841                                  | 100 % |        |                 |        |                   |
| <i>NP</i>           | MT84565<br>8 | A/aquatic<br>bird/South<br>Ko-<br>rea/sw001/2<br>015(H7N1) | MF98789<br>6 | 1,497          |                                     |                     |                     | 34,473               |                                        |       | 1,497  | ADP0757<br>4.1  | 498    | 495/498<br>(99%)  |
| <i>NA</i>           | MT84565<br>9 | A/tufted<br>duck/Geor-<br>gia/1/2012(<br>H2N3)             | MF14710<br>2 | 1,453          |                                     |                     |                     | 47,446               |                                        |       | 1,455  | BAU5075<br>1.1  | 469    | 465/469<br>(99%)  |
| <i>M2,<br/>M1</i>   | MT84566<br>0 | A/mallard<br>duck/Geor-<br>gia/10/2016(<br>H7N7)           | MF69415<br>0 | 1,027          |                                     |                     |                     | 258,104              |                                        |       | 1,028  | Q08IG8.1<br>8.1 | 252    | 252/252<br>(100%) |
| <i>NEP,<br/>NS1</i> | MT84566<br>1 | A/mal-<br>lard/Ba-<br>varia/185-<br>26/2008(H1<br>N1)      | HQ25923<br>6 | 873            |                                     |                     |                     | 102,240              |                                        |       | 873    | QHG6251<br>6.1  | 230    | 229/230<br>(99%)  |
